# Supplementary material for: Comparative Transcriptome Analysis of a Toxin-Producing Dinoflagellate Alexandrium catenella and Its Non-Toxic Mutant
Source: Mar Drugs. 2014 Nov 24;12(11):5698–718. doi: 10.3390/md12115698 (PMC4245552; doi:10.3390/md12115698)
Supplement: Supplementary File 1 [file marinedrugs-12-05698-s001.xlsx]

## Sheet: NvsT.DEG
Supplementary Table S1. Differentially expressed genes between ACHK-T and ACHK-NT. Listed are (column A) unigene ID, (B-C) normalized read count of each sample, (D-F) fold change, p-values and q-values for NT/T, (G) gene length, and (H-S) annotations in databases NR, KEGG, Pfam and KOG.
Gene_id	N_readcount	T_readcount	log2.Fold_change.	p.value	q.value.Storey.et.al..2003.	Up or Down	Gene Length	NR GI	NR ID	NR Score	NR Evalue	NR Description	KO ID	KO Name	KO Description	PFAM ID	PFAM description	KOG ID	KOG Description
comp66063_c0	2	37391.3	-14.226	2.9277e-59	1.5914e-54	Down	2022	546309190	XP_005713951.1	1064	2e-134	exoglucanase 3 1,4-beta-cellobiohydrolase3 family GH6, Exoglucanase 3 (Pyrenophora tritici-repentis (strain Pt-1C-BFP)), Predicted CDS Pa_4_2420 (Podospora anserina) [Chondrus crispus]	K01179	E3.2.1.4	endoglucanase	PF08492//PF01341//PF01254	SRP72 RNA-binding domain//Glycosyl hydrolases family 6//Nuclear transition protein 2	--	--
comp66169_c0	1	12503.8	-13.646	2.3452e-23	3.6423e-19	Down	4481	328926200	ADY62525.1	5591	0	SxtA long isoform precursor [Alexandrium fundyense]	K00639	kbl, GCAT	glycine C-acetyltransferase	PF00266	Aminotransferase class-V	KOG3544	Collagens (type IV and type XIII), and related proteins
comp57121_c1	3	15706	-12.39	2.2018e-36	3.9896e-32	Down	1356	547259839	WP_021994825.1	390	5e-41	putative uncharacterized protein [Sutterella wadsworthensis CAG:135]	--	--	--	PF01403	Sema domain	--	--
comp66059_c0	3	3644.78	-10.282	3.9735e-13	2.3999e-09	Down	5009	551535065	XP_005756358.1	394	7e-35	hypothetical protein Pmar_PMAR010035 [Perkinsus marinus ATCC 50983] >gi|239904046|gb|EER20301.1| hypothetical protein Pmar_PMAR010035 [Perkinsus marinus ATCC 50983]	K04615	GABBR	gamma-aminobutyric acid type B receptor	PF07562	Nine Cysteines Domain of family 3 GPCR	KOG1869	Splicing coactivator SRm160/300, subunit SRm300
comp47304_c0	15	4102.99	-8.131	9.5762e-19	8.93e-15	Down	931	189337863	BAG46932.1	823	3e-106	cell wall-associated hydrolase [Burkholderia multivorans ATCC 17616]	--	--	--	--	--	--	--
comp57121_c0	0	4113	-7.3658	5.4199e-20	5.8923e-16	Down	750	260222398	CBA31922.1	414	9e-47	hypothetical protein Csp_D29540 [Curvibacter putative symbiont of Hydra magnipapillata]	--	--	--	--	--	--	--
comp62287_c0	28.75	3542.4	-6.9805	7.4063e-18	6.1937e-14	Down	1570	485701964	WP_001335071.1	632	2e-76	hypothetical protein, partial [Escherichia coli]	--	--	--	--	--	--	--
comp64637_c0	0	2734.05	-6.7766	2.8264e-14	1.8075e-10	Down	5744	242022148	XP_002431503.1	877	2e-96	enzymatic polyprotein; Endonuclease; Reverse transcriptase, putative [Pediculus humanus corporis]	--	--	--	PF00078//PF00665	Reverse transcriptase (RNA-dependent DNA polymerase)//Integrase core domain	KOG0017	FOG: Transposon-encoded proteins with TYA, reverse transcriptase, integrase domains in various combinations
comp46928_c0	15	1300.95	-6.4739	1.2746e-07	0.0004619	Down	2267	309358121	CAP34469.2	161	5e-08	Protein CBR-LARP-1 [Caenorhabditis briggsae]	--	--	--	--	--	KOG1911	Heterochromatin-associated protein HP1 and related CHROMO domain proteins
comp114480_c0	180	1354	-2.9466	6.0537e-06	0.016453	Down	1913	226225634	YP_002759740.1	760	1e-88	putative S12 family peptidase [Gemmatimonas aurantiaca T-27]	--	--	--	--	--	--	--
comp66521_c0	11289.2	28698.1	-1.3815	1.0086e-37	2.1931e-33	Down	5319	563706909	YP_008871513.1	167	2e-08	Ankyrin repeats containing protein [delta proteobacterium BABL1]	--	--	--	PF01633//PF00437//PF00004//PF00023//PF07728	Choline/ethanolamine kinase//Type II/IV secretion system protein//ATPase family associated with various cellular activities (AAA)//Ankyrin repeat//AAA domain (dynein-related subfamily)	--	--
comp60385_c0	2671.63	5630.9	-1.1111	1.6107e-06	0.0047326	Down	563	--	--	--	--	--	--	--	--	--	--	--	--
comp47283_c1	15773.4	25201.2	-0.71144	2.8602e-12	1.6366e-08	Down	1810	17369874	Q9XQV2.1	1728	0	RecName: Full=Photosystem I P700 chlorophyll a apoprotein A2; AltName: Full=PSI-B; AltName: Full=PsaB >gi|5532298|gb|AAD44699.1| PSI P700 apoprotein A2 [Heterocapsa triquetra] >gi|239918900|gb|ACS34799.1| PSI P700 apoprotein A2 [Heterocapsa triquetra]	K02690	psaB	photosystem I P700 chlorophyll a apoprotein A2	PF00223	Photosystem I psaA/psaB protein	--	--
comp64975_c0	119074	74056.4	0.64972	2.6761e-42	9.698e-38	Up	1948	193883933	BAG54821.1	1970	0	cytochrome c oxidase subunit 1 [Alexandrium catenella]	K02256	COX1	cytochrome c oxidase subunit 1	PF00115//PF05372	Cytochrome C and Quinol oxidase polypeptide I//Delta lysin family	--	--
comp65226_c1	19727.5	12087.2	0.67129	1.1463e-08	4.793e-05	Up	688	306430543	CBI83412.1	341	1.69917e-35	light-harvesting protein, partial [Symbiodinium sp. clade C3]	--	--	--	PF02907	Hepatitis C virus NS3 protease	--	--
comp54599_c0	40289.8	24201.7	0.69987	2.5391e-17	1.9717e-13	Up	993	--	--	--	--	--	--	--	--	PF00539//PF03839	Transactivating regulatory protein (Tat)//Translocation protein Sec62	--	--
comp65353_c0	11048.6	6220.45	0.79333	7.4895e-07	0.0023948	Up	1592	401409876	XP_003884386.1	981	4e-118	hypothetical protein NCLIV_047860 [Neospora caninum Liverpool]	K13126	PABPC	polyadenylate-binding protein	--	--	KOG1187	Serine/threonine protein kinase
comp63840_c0	8189.47	4453.25	0.84347	7.0572e-06	0.018713	Up	1666	58613587	AAW79380.1	378	2.65326e-37	probable high CO2 inducible periplasmic protein [Heterocapsa triquetra]	--	--	--	--	--	--	--
comp65627_c0	31244	16909.1	0.85033	9.8569e-19	8.93e-15	Up	1045	109895128	ABG47416.1	1282	1.741e-175	proliferating cell nuclear antigen [Alexandrium affine]	K04802	PCNA	proliferating cell nuclear antigen	PF04139//PF00705//PF02144//PF02747	Rad9//Proliferating cell nuclear antigen, N-terminal domain//Repair protein Rad1/Rec1/Rad17//Proliferating cell nuclear antigen, C-terminal domain	KOG1636	DNA polymerase delta processivity factor (proliferating cell nuclear antigen)
comp66053_c0	60305.5	30993.9	0.92486	9.8755e-40	2.6841e-35	Up	1661	56112313	AAV71135.1	1777	0	plastid C1 class II fructose bisphosphate aldolase [Heterocapsa triquetra]	K01624	FBA, fbaA	fructose-bisphosphate aldolase, class II	PF01116	Fructose-bisphosphate aldolase class-II	KOG4153	Fructose 1,6-bisphosphate aldolase
comp66077_c1	8811.01	4410	0.96308	1.8362e-07	0.00064395	Up	2681	569381452	ETO15300.1	1620	0	hypothetical protein RFI_22066 [Reticulomyxa filosa]	K00323	NNT	NAD(P) transhydrogenase	PF07740//PF02233//PF00205	Spider potassium channel inhibitory toxin//NAD(P) transhydrogenase beta subunit//Thiamine pyrophosphate enzyme, central domain	--	--
comp65597_c0	8402.67	4024.29	1.0267	7.8056e-08	0.00029262	Up	1739	495373558	WP_008098270.1	170	8e-11	hypothetical protein [Verrucomicrobiae bacterium DG1235]	--	--	--	PF11593//PF01328//PF00110//PF07941	Mediator complex subunit 3 fungal//Peroxidase, family 2//wnt family//Potassium channel Kv1.4 tandem inactivation domain	--	--
comp65950_c0	5831.47	2682.38	1.0849	2.8341e-06	0.0081083	Up	1313	327263427	XP_003216521.1	461	8.0742e-50	PREDICTED: phosphoserine aminotransferase-like [Anolis carolinensis]	K00831	serC, PSAT1	phosphoserine aminotransferase	PF03971//PF00266	Monomeric isocitrate dehydrogenase//Aminotransferase class-V	KOG2790	Phosphoserine aminotransferase
comp33299_c0	5150	2360	1.0903	9.9444e-06	0.025741	Up	2335	557125080	CDI77559.1	1263	1e-158	Eukaryotic translation initiation factor 3 subunit 9, putative [Eimeria acervulina]	K03253	EIF3B	translation initiation factor 3 subunit B	PF00400//PF00076	WD domain, G-beta repeat//RNA recognition motif. (a.k.a. RRM, RBD, or RNP domain)	KOG2314	Translation initiation factor 3, subunit b (eIF-3b)
comp70851_c0	2940.5	975	1.5571	1.0621e-05	0.026852	Up	1562	294950107	XP_002786464.1	1157	6.69153e-151	Calcium-dependent protein kinase, putative [Perkinsus marinus ATCC 50983] >gi|239900756|gb|EER18260.1| Calcium-dependent protein kinase, putative [Perkinsus marinus ATCC 50983]	K13412	CPK	calcium-dependent protein kinase	PF10591//PF06293//PF07714//PF00069	Secreted protein acidic and rich in cysteine Ca binding region//Lipopolysaccharide kinase (Kdo/WaaP) family//Protein tyrosine kinase//Protein kinase domain	KOG0032	Ca2+/calmodulin-dependent protein kinase, EF-Hand protein superfamily
comp71917_c0	2656.96	861	1.5902	2.1256e-05	0.049168	Up	1196	--	--	--	--	--	--	--	--	--	--	KOG4676	Splicing factor, arginine/serine-rich
comp62882_c0	14038.7	4456	1.6201	3.9326e-23	5.3442e-19	Up	5281	405954292	EKC21775.1	1059	6.67444e-116	SCO-spondin [Crassostrea gigas]	--	--	--	PF05690	Thiazole biosynthesis protein ThiG	KOG3538	Disintegrin metalloproteinases with thrombospondin repeats
comp63141_c0	11545.3	3106	1.8587	4.4809e-23	5.4128e-19	Up	1871	156743634	YP_001433763.1	265	1e-20	hypothetical protein Rcas_3705 [Roseiflexus castenholzii DSM 13941]	--	--	--	PF00515//PF01912	Tetratricopeptide repeat//eIF-6 family	--	--
comp65143_c0	58658.9	11917.1	2.2639	1.2746e-141	1.3857e-136	Up	992	306430543	CBI83412.1	382	3.38114e-40	light-harvesting protein, partial [Symbiodinium sp. clade C3]	--	--	--	--	--	--	--
comp65099_c0	3250.62	428.7	2.8872	8.5144e-12	4.4079e-08	Up	652	294882034	XP_002769574.1	615	2.496e-75	Phosphoserine aminotransferase, putative [Perkinsus marinus ATCC 50983] >gi|239873126|gb|EER02292.1| Phosphoserine aminotransferase, putative [Perkinsus marinus ATCC 50983]	K00831	serC, PSAT1	phosphoserine aminotransferase	PF00266	Aminotransferase class-V	KOG2790	Phosphoserine aminotransferase
comp47128_c0	956.92	52	4.1664	1.8142e-05	0.044106	Up	6281	--	--	--	--	--	--	--	--	PF04434//PF02045//PF08092//PF08290//PF01020	SWIM zinc finger//CCAAT-binding transcription factor (CBF-B/NF-YA) subunit B//Magi peptide toxin family//Hepatitis core protein, putative zinc finger//Ribosomal L40e family	--	--
comp64715_c0	1765.01	55	4.9687	1.5136e-09	6.7812e-06	Up	1086	--	--	--	--	--	--	--	--	--	--	--	--
comp57722_c1	872	0	5.0926	2.0349e-05	0.048093	Up	1696	--	--	--	--	--	--	--	--	PF01295	Adenylate cyclase, class-I	--	--
comp57938_c1	1421.88	19	6.1902	4.5175e-08	0.0001819	Up	968	4416330	AAD20318.1	301	1.00363e-29	S-adenosyl-homocysteine hydrolase like protein, partial [Alexandrium fundyense]	K01251	E3.3.1.1, ahcY	adenosylhomocysteinase	PF12797//PF00499//PF00037//PF12798//PF12838//PF12837	4Fe-4S binding domain//NADH-ubiquinone/plastoquinone oxidoreductase chain 6//4Fe-4S binding domain//4Fe-4S binding domain//4Fe-4S dicluster domain//4Fe-4S binding domain	KOG1370	S-adenosylhomocysteine hydrolase
comp64901_c0	1290	10	6.9758	2.9914e-07	0.0010163	Up	2525	--	--	--	--	--	--	--	--	PF00013	KH domain	KOG2146	Splicing coactivator SRm160/300, subunit SRm160 (contains PWI domain)

## Sheet: tblastn
Supplementary Table S2. TBLASTN search of candidate STX genes in the Alexandrium catenella transcriptome. Each sign of ‘TBLASTN 2.2.28+’ represents an independent blast for 26 cyanobacterial proteins.
# TBLASTN 2.2.28+
# Query: gi|114462352|gb|ABI75094.1| polyketide synthase-related protein [Cylindrospermopsis raciborskii T3]
# Database: unigene_n
# Fields: query id, subject id, % identity, alignment length, mismatches, gap opens, q. start, q. end, s. start, s. end, evalue, bit score
# 10 hits found
gi|114462352|gb|ABI75094.1|	comp65842_c0	32.8	756	468	17	9	730	2676	427	8e-113	380
gi|114462352|gb|ABI75094.1|	comp20666_c0	34.09	613	378	13	154	751	643	2448	1e-103	357
gi|114462352|gb|ABI75094.1|	comp66169_c0	31.94	739	439	16	10	702	267	2429	1e-101	357
gi|114462352|gb|ABI75094.1|	comp66169_c0	35.19	395	237	6	849	1230	2922	4088	3e-56	216
gi|114462352|gb|ABI75094.1|	comp34805_c0	31.99	744	439	22	9	702	3035	855	9e-91	323
gi|114462352|gb|ABI75094.1|	comp43979_c0	34.88	516	320	9	204	705	2348	807	3e-85	303
gi|114462352|gb|ABI75094.1|	comp27100_c0	30.46	417	262	11	302	703	1089	2300	9e-37	152
gi|114462352|gb|ABI75094.1|	comp73311_c0	29.28	222	144	5	831	1042	1457	801	5e-15	80.9
gi|114462352|gb|ABI75094.1|	comp31669_c0	25.37	406	252	11	832	1214	1359	226	9e-13	73.6
gi|114462352|gb|ABI75094.1|	comp63951_c0	25.76	198	120	6	921	1105	2584	2033	2e-07	57.4
# BLAST processed 1 queries
# TBLASTN 2.2.28+
# Query: gi|114462351|gb|ABI75093.1| cytidine deaminase [Cylindrospermopsis raciborskii T3]
# Database: unigene_n
# Fields: query id, subject id, % identity, alignment length, mismatches, gap opens, q. start, q. end, s. start, s. end, evalue, bit score
# 2 hits found
gi|114462351|gb|ABI75093.1|	comp21499_c0	32.86	283	142	8	51	310	530	1303	1e-28	116
gi|114462351|gb|ABI75093.1|	comp115379_c0	33.58	271	153	8	44	306	248	1003	1e-22	98.6
# BLAST processed 1 queries
# TBLASTN 2.2.28+
# Query: gi|114462350|gb|ABI75092.1| SxtC [Cylindrospermopsis raciborskii T3]
# Database: unigene_n
# 0 hits found
# BLAST processed 1 queries
# TBLASTN 2.2.28+
# Query: gi|114462347|gb|ABI75089.1| sterole desaturase [Cylindrospermopsis raciborskii T3]
# Database: unigene_n
# Fields: query id, subject id, % identity, alignment length, mismatches, gap opens, q. start, q. end, s. start, s. end, evalue, bit score
# 1 hits found
gi|114462347|gb|ABI75089.1|	comp48163_c0	25.36	138	91	4	94	224	542	940	2e-06	50.1
# BLAST processed 1 queries
# TBLASTN 2.2.28+
# Query: gi|114462353|gb|ABI75095.1| SxtE [Cylindrospermopsis raciborskii T3]
# Database: unigene_n
# 0 hits found
# BLAST processed 1 queries
# TBLASTN 2.2.28+
# Query: gi|114462354|gb|ABI75096.1| sodium-driven multidrug and toxic compound extrusion protein [Cylindrospermopsis raciborskii T3]
# Database: unigene_n
# Fields: query id, subject id, % identity, alignment length, mismatches, gap opens, q. start, q. end, s. start, s. end, evalue, bit score
# 2 hits found
gi|114462354|gb|ABI75096.1|	comp22617_c0	30.14	219	135	5	185	396	932	309	4e-20	94.7
gi|114462354|gb|ABI75096.1|	comp65293_c0	21.7	318	224	6	78	390	268	1161	1e-07	55.5
# BLAST processed 1 queries
# TBLASTN 2.2.28+
# Query: gi|114462355|gb|ABI75097.1| amidinotransferase [Cylindrospermopsis raciborskii T3]
# Database: unigene_n
# Fields: query id, subject id, % identity, alignment length, mismatches, gap opens, q. start, q. end, s. start, s. end, evalue, bit score
# 2 hits found
gi|114462355|gb|ABI75097.1|	comp30692_c0	27.51	309	203	10	83	375	1159	248	1e-23	103
gi|114462355|gb|ABI75097.1|	comp63408_c0	25.69	397	235	17	13	369	1227	97	6e-17	83.2
# BLAST processed 1 queries
# TBLASTN 2.2.28+
# Query: gi|114462356|gb|ABI75098.1| phenylpropionate dioxygenase [Cylindrospermopsis raciborskii T3]
# Database: unigene_n
# Fields: query id, subject id, % identity, alignment length, mismatches, gap opens, q. start, q. end, s. start, s. end, evalue, bit score
# 15 hits found
gi|114462356|gb|ABI75098.1|	comp55506_c0	27.99	343	208	15	10	328	311	1294	2e-24	105
gi|114462356|gb|ABI75098.1|	comp27047_c0	25.47	369	209	13	10	328	336	1394	9e-22	97.8
gi|114462356|gb|ABI75098.1|	comp55174_c0	25.47	369	214	13	12	329	1475	399	4e-17	83.6
gi|114462356|gb|ABI75098.1|	comp32230_c0	40.17	117	58	4	10	118	1464	1126	4e-15	77.4
gi|114462356|gb|ABI75098.1|	comp310841_c0	29.36	218	123	8	12	204	160	795	4e-14	74.3
gi|114462356|gb|ABI75098.1|	comp117608_c0	24.26	338	220	12	10	326	284	1252	1e-13	73.2
gi|114462356|gb|ABI75098.1|	comp19781_c0	29.49	217	122	10	10	202	368	997	6e-13	70.9
gi|114462356|gb|ABI75098.1|	comp55698_c0	28.8	184	107	6	9	171	341	883	8e-13	69.7
gi|114462356|gb|ABI75098.1|	comp60722_c0	29.53	193	114	9	10	186	1026	1586	7e-12	67.8
gi|114462356|gb|ABI75098.1|	comp52496_c0	29.21	202	122	10	12	194	442	1041	7e-11	64.7
gi|114462356|gb|ABI75098.1|	comp61215_c1	23.4	359	222	17	12	328	1491	448	7e-11	64.7
gi|114462356|gb|ABI75098.1|	comp62463_c1	30.73	179	98	11	12	171	428	943	8e-10	61.6
gi|114462356|gb|ABI75098.1|	comp29464_c0	27.22	180	110	7	9	169	234	767	4e-09	59.3
gi|114462356|gb|ABI75098.1|	comp122298_c0	30.17	116	74	3	10	120	1203	862	3e-07	53.5
gi|114462356|gb|ABI75098.1|	comp98004_c0	23.51	251	160	9	10	242	532	1242	9e-07	52
# BLAST processed 1 queries
# TBLASTN 2.2.28+
# Query: gi|114462357|gb|ABI75099.1| NodU/CmcH-related carbamoyltransferase [Cylindrospermopsis raciborskii T3]
# Database: unigene_n
# Fields: query id, subject id, % identity, alignment length, mismatches, gap opens, q. start, q. end, s. start, s. end, evalue, bit score
# 3 hits found
gi|114462357|gb|ABI75099.1|	comp53314_c0	31.24	429	243	17	184	592	1260	70	8e-31	129
gi|114462357|gb|ABI75099.1|	comp53314_c0	51.92	52	25	0	3	54	1878	1723	3e-08	58.2
gi|114462357|gb|ABI75099.1|	comp65949_c0	27.86	359	196	9	269	586	1315	2325	3e-22	103
# BLAST processed 1 queries
# TBLASTN 2.2.28+
# Query: gi|114462358|gb|ABI75100.1| SxtJ [Cylindrospermopsis raciborskii T3]
# Database: unigene_n
# 0 hits found
# BLAST processed 1 queries
# TBLASTN 2.2.28+
# Query: gi|114462359|gb|ABI75101.1| SxtK [Cylindrospermopsis raciborskii T3]
# Database: unigene_n
# 0 hits found
# BLAST processed 1 queries
# TBLASTN 2.2.28+
# Query: gi|114462360|gb|ABI75102.1| GDSL-lipase [Cylindrospermopsis raciborskii T3]
# Database: unigene_n
# 0 hits found
# BLAST processed 1 queries
# TBLASTN 2.2.28+
# Query: gi|114462361|gb|ABI75103.1| sodium-driven multidrug and toxic compound extrusion protein [Cylindrospermopsis raciborskii T3]
# Database: unigene_n
# Fields: query id, subject id, % identity, alignment length, mismatches, gap opens, q. start, q. end, s. start, s. end, evalue, bit score
# 2 hits found
gi|114462361|gb|ABI75103.1|	comp22617_c0	32.14	252	160	6	190	437	941	207	2e-19	92.4
gi|114462361|gb|ABI75103.1|	comp65293_c0	27.27	176	116	5	200	373	598	1095	2e-09	61.2
# BLAST processed 1 queries
# TBLASTN 2.2.28+
# Query: gi|114462362|gb|ABI75104.1| sulfotransferase [Cylindrospermopsis raciborskii T3]
# Database: unigene_n
# Fields: query id, subject id, % identity, alignment length, mismatches, gap opens, q. start, q. end, s. start, s. end, evalue, bit score
# 1 hits found
gi|114462362|gb|ABI75104.1|	comp318125_c0	24.45	274	170	10	3	267	222	959	5e-12	67
# BLAST processed 1 queries
# TBLASTN 2.2.28+
# Query: gi|114462373|gb|ABI75115.1| adenylylsulfate kinase [Cylindrospermopsis raciborskii T3]
# Database: unigene_n
# Fields: query id, subject id, % identity, alignment length, mismatches, gap opens, q. start, q. end, s. start, s. end, evalue, bit score
# 1 hits found
gi|114462373|gb|ABI75115.1|	comp43217_c0	50.28	177	81	3	1	171	849	322	8e-51	171
# BLAST processed 1 queries
# TBLASTN 2.2.28+
# Query: gi|114462372|gb|ABI75114.1| putative saxitoxin-binding protein [Cylindrospermopsis raciborskii T3]
# Database: unigene_n
# 0 hits found
# BLAST processed 1 queries
# TBLASTN 2.2.28+
# Query: gi|114462371|gb|ABI75113.1| SxtQ [Cylindrospermopsis raciborskii T3]
# Database: unigene_n
# 0 hits found
# BLAST processed 1 queries
# TBLASTN 2.2.28+
# Query: gi|114462370|gb|ABI75112.1| acyl-CoA N-acyltransferase [Cylindrospermopsis raciborskii T3]
# Database: unigene_n
# 0 hits found
# BLAST processed 1 queries
# TBLASTN 2.2.28+
# Query: gi|114462368|gb|ABI75110.1| phytanoyl-CoA dioxygenase [Cylindrospermopsis raciborskii T3]
# Database: unigene_n
# 0 hits found
# BLAST processed 1 queries
# TBLASTN 2.2.28+
# Query: gi|114462367|gb|ABI75109.1| phenylpropionate dioxygenase [Cylindrospermopsis raciborskii T3]
# Database: unigene_n
# Fields: query id, subject id, % identity, alignment length, mismatches, gap opens, q. start, q. end, s. start, s. end, evalue, bit score
# 15 hits found
gi|114462367|gb|ABI75109.1|	comp55506_c0	25.76	295	191	7	53	328	437	1294	2e-20	93.6
gi|114462367|gb|ABI75109.1|	comp27047_c0	30.92	207	125	7	10	204	336	938	5e-19	89.4
gi|114462367|gb|ABI75109.1|	comp55174_c0	27.25	378	196	18	12	329	1475	399	2e-17	84.7
gi|114462367|gb|ABI75109.1|	comp32230_c0	31.48	216	123	9	10	205	1464	832	4e-15	77.8
gi|114462367|gb|ABI75109.1|	comp60722_c0	28.45	239	119	11	10	207	1026	1709	4e-15	77.8
gi|114462367|gb|ABI75109.1|	comp310841_c0	29.38	211	122	8	12	201	160	774	1e-14	75.9
gi|114462367|gb|ABI75109.1|	comp61215_c1	25.14	362	204	19	15	328	1476	448	2e-14	75.5
gi|114462367|gb|ABI75109.1|	comp19781_c0	28.63	255	155	8	10	241	368	1120	5e-14	74.3
gi|114462367|gb|ABI75109.1|	comp55698_c0	29.35	184	106	6	9	171	341	883	3e-13	70.9
gi|114462367|gb|ABI75109.1|	comp117608_c0	28.19	188	121	5	3	177	254	814	4e-13	71.6
gi|114462367|gb|ABI75109.1|	comp52496_c0	28.57	224	127	11	22	217	481	1137	6e-11	65.1
gi|114462367|gb|ABI75109.1|	comp62463_c1	29.17	168	92	8	22	171	467	943	3e-10	62.8
gi|114462367|gb|ABI75109.1|	comp98004_c0	30.37	191	104	10	29	198	589	1137	3e-10	62.8
gi|114462367|gb|ABI75109.1|	comp122298_c0	30.83	120	76	3	6	120	1215	862	3e-08	56.6
gi|114462367|gb|ABI75109.1|	comp29464_c0	27.78	180	109	7	9	169	234	767	1e-07	54.3
# BLAST processed 1 queries
# TBLASTN 2.2.28+
# Query: gi|114462366|gb|ABI75108.1| short-chain alcohol dehydrogenase [Cylindrospermopsis raciborskii T3]
# Database: unigene_n
# Fields: query id, subject id, % identity, alignment length, mismatches, gap opens, q. start, q. end, s. start, s. end, evalue, bit score
# 59 hits found
gi|114462366|gb|ABI75108.1|	comp27634_c0	40.38	260	135	7	1	244	40	807	3e-32	123
gi|114462366|gb|ABI75108.1|	comp100612_c0	37.8	164	90	3	84	241	362	835	2e-25	104
gi|114462366|gb|ABI75108.1|	comp94193_c0	32.9	231	146	6	4	227	920	234	1e-20	91.3
gi|114462366|gb|ABI75108.1|	comp96359_c0	37.17	191	116	2	3	192	988	425	4e-20	89.4
gi|114462366|gb|ABI75108.1|	comp17645_c0	31.38	188	117	5	59	244	680	147	1e-19	87.8
gi|114462366|gb|ABI75108.1|	comp143277_c0	33	203	133	3	5	205	748	143	1e-17	81.3
gi|114462366|gb|ABI75108.1|	comp151661_c0	33.04	227	147	1	5	226	63	743	2e-17	81.3
gi|114462366|gb|ABI75108.1|	comp53986_c0	31.54	241	153	4	5	236	827	114	3e-17	81.3
gi|114462366|gb|ABI75108.1|	comp35260_c0	39.29	140	81	3	55	191	460	876	4e-17	81.6
gi|114462366|gb|ABI75108.1|	comp86351_c0	31.17	247	154	6	8	247	755	42	1e-16	78.6
gi|114462366|gb|ABI75108.1|	comp22764_c0	34.8	204	121	3	3	194	165	776	1e-16	79.7
gi|114462366|gb|ABI75108.1|	comp19709_c0	31.09	238	142	5	7	225	608	1312	2e-16	79.7
gi|114462366|gb|ABI75108.1|	comp10777_c0	30.77	169	104	3	52	212	344	835	9e-16	77.4
gi|114462366|gb|ABI75108.1|	comp26494_c0	29.82	171	111	3	64	226	97	606	3e-14	72
gi|114462366|gb|ABI75108.1|	comp26967_c0	31.7	224	140	4	10	226	982	329	1e-13	70.9
gi|114462366|gb|ABI75108.1|	comp101767_c0	26.52	132	96	1	60	191	822	430	1e-13	70.9
gi|114462366|gb|ABI75108.1|	comp93922_c0	29.92	244	154	6	5	242	916	218	3e-13	69.7
gi|114462366|gb|ABI75108.1|	comp14740_c0	32.66	248	143	7	3	231	243	971	3e-13	70.1
gi|114462366|gb|ABI75108.1|	comp102774_c0	34.83	201	127	2	5	204	104	697	4e-13	69.3
gi|114462366|gb|ABI75108.1|	comp85420_c0	32.56	172	102	8	67	230	253	750	5e-13	69.3
gi|114462366|gb|ABI75108.1|	comp33310_c0	34.39	189	117	2	5	186	1028	462	6e-13	68.9
gi|114462366|gb|ABI75108.1|	comp326199_c0	29.8	245	148	9	4	227	168	893	1e-12	68.2
gi|114462366|gb|ABI75108.1|	comp82119_c0	33.97	156	93	4	63	209	328	792	1e-12	68.2
gi|114462366|gb|ABI75108.1|	comp41049_c0	33.33	219	133	8	3	215	118	753	1e-12	68.2
gi|114462366|gb|ABI75108.1|	comp95232_c0	30.41	148	98	3	51	194	217	657	3e-12	67
gi|114462366|gb|ABI75108.1|	comp49494_c1	30.87	149	92	3	55	192	597	151	4e-12	64.7
gi|114462366|gb|ABI75108.1|	comp33752_c0	30	150	94	3	55	193	784	335	9e-12	65.5
gi|114462366|gb|ABI75108.1|	comp91207_c0	29.49	156	107	3	63	216	389	853	3e-11	63.9
gi|114462366|gb|ABI75108.1|	comp65798_c0	31.94	191	118	2	5	186	3099	3662	4e-11	64.3
gi|114462366|gb|ABI75108.1|	comp29900_c0	31.4	172	110	5	55	220	275	784	4e-11	63.5
gi|114462366|gb|ABI75108.1|	comp83619_c0	33.16	193	119	5	7	191	1090	518	4e-11	63.5
gi|114462366|gb|ABI75108.1|	comp208097_c0	32.43	185	106	7	51	227	102	623	1e-10	62.4
gi|114462366|gb|ABI75108.1|	comp49986_c0	30.53	190	127	3	3	191	105	662	1e-10	62
gi|114462366|gb|ABI75108.1|	comp19540_c0	31.25	208	139	2	4	211	1033	422	2e-10	62
gi|114462366|gb|ABI75108.1|	comp37842_c0	31.86	204	122	6	4	194	89	688	2e-10	61.2
gi|114462366|gb|ABI75108.1|	comp43973_c0	28.77	219	138	6	3	210	52	687	4e-10	60.8
gi|114462366|gb|ABI75108.1|	comp92339_c0	28.86	149	102	3	53	197	317	763	5e-10	60.1
gi|114462366|gb|ABI75108.1|	comp61564_c0	28.91	128	88	1	87	211	764	381	9e-10	59.3
gi|114462366|gb|ABI75108.1|	comp54717_c0	26.85	149	100	3	83	227	718	287	9e-10	59.3
gi|114462366|gb|ABI75108.1|	comp35692_c0	34.24	184	111	4	3	176	987	436	1e-09	59.3
gi|114462366|gb|ABI75108.1|	comp1117_c0	35.79	95	58	2	57	150	556	278	1e-09	58.9
gi|114462366|gb|ABI75108.1|	comp27198_c0	28.38	229	149	3	1	215	1055	372	2e-09	58.2
gi|114462366|gb|ABI75108.1|	comp118370_c0	32.43	111	74	1	85	194	775	443	1e-08	55.8
gi|114462366|gb|ABI75108.1|	comp57677_c0	35.04	117	74	2	76	191	746	399	6e-08	54.3
gi|114462366|gb|ABI75108.1|	comp38051_c0	25.71	175	107	3	62	213	465	989	1e-07	53.5
gi|114462366|gb|ABI75108.1|	comp146522_c0	30.39	204	124	8	3	191	104	706	1e-07	53.1
gi|114462366|gb|ABI75108.1|	comp48447_c0	31.39	137	88	4	61	191	273	683	2e-07	52.8
gi|114462366|gb|ABI75108.1|	comp34321_c0	27.78	198	141	1	4	201	1885	1298	2e-07	52.8
gi|114462366|gb|ABI75108.1|	comp63056_c0	33.84	198	122	7	5	195	70	657	2e-07	52
gi|114462366|gb|ABI75108.1|	comp89394_c0	34.32	169	102	2	5	164	149	655	3e-07	52
gi|114462366|gb|ABI75108.1|	comp96198_c0	29.94	167	115	1	1	167	56	550	4e-07	51.6
gi|114462366|gb|ABI75108.1|	comp11302_c0	29.14	175	110	5	5	170	136	645	7e-07	50.4
gi|114462366|gb|ABI75108.1|	comp115503_c0	28.46	260	146	8	3	227	52	816	1e-06	50.1
gi|114462366|gb|ABI75108.1|	comp102815_c0	30.46	197	126	3	4	191	885	301	4e-06	48.5
gi|114462366|gb|ABI75108.1|	comp65853_c0	26.32	133	93	3	64	191	307	705	4e-06	48.5
gi|114462366|gb|ABI75108.1|	comp83994_c0	26.14	176	109	7	63	222	852	340	4e-06	48.5
gi|114462366|gb|ABI75108.1|	comp28619_c0	25.51	243	177	3	4	242	845	117	4e-06	48.5
gi|114462366|gb|ABI75108.1|	comp157239_c0	27.11	273	167	7	2	242	195	1013	5e-06	48.5
gi|114462366|gb|ABI75108.1|	comp94760_c0	30.21	192	124	4	8	189	940	365	6e-06	48.1
# BLAST processed 1 queries
# TBLASTN 2.2.28+
# Query: gi|114462365|gb|ABI75107.1| FAD-dependent succinate dehydrogenase/fumarate reductase [Cylindrospermopsis raciborskii T3]
# Database: unigene_n
# 0 hits found
# BLAST processed 1 queries
# TBLASTN 2.2.28+
# Query: gi|114462364|gb|ABI75106.1| ferredoxin [Cylindrospermopsis raciborskii T3]
# Database: unigene_n
# 0 hits found
# BLAST processed 1 queries
# TBLASTN 2.2.28+
# Query: gi|114462363|gb|ABI75105.1| cephalosporin hydroxylase [Cylindrospermopsis raciborskii T3]
# Database: unigene_n
# Fields: query id, subject id, % identity, alignment length, mismatches, gap opens, q. start, q. end, s. start, s. end, evalue, bit score
# 1 hits found
gi|114462363|gb|ABI75105.1|	comp128551_c0	31.17	154	86	7	53	189	985	1437	7e-10	60.5
# BLAST processed 1 queries
# TBLASTN 2.2.28+
# Query: gi|114462375|gb|ABI75117.1| phosphate uptake regulator [Cylindrospermopsis raciborskii T3]
# Database: unigene_n
# 0 hits found
# BLAST processed 1 queries
# TBLASTN 2.2.28+
# Query: gi|114462376|gb|ABI75118.1| histidine kinase [Cylindrospermopsis raciborskii T3]
# Database: unigene_n
# Fields: query id, subject id, % identity, alignment length, mismatches, gap opens, q. start, q. end, s. start, s. end, evalue, bit score
# 6 hits found
gi|114462376|gb|ABI75118.1|	comp51512_c0	24.83	294	167	10	174	448	1588	812	2e-11	68.2
gi|114462376|gb|ABI75118.1|	comp20769_c0	23.91	297	174	8	174	450	1405	2199	3e-09	60.8
gi|114462376|gb|ABI75118.1|	comp66219_c0	25.19	258	147	12	195	440	2284	1613	8e-09	59.7
gi|114462376|gb|ABI75118.1|	comp64911_c0	22.75	255	154	8	198	438	1480	2157	2e-07	55.1
gi|114462376|gb|ABI75118.1|	comp61883_c0	22.39	259	150	8	200	444	585	1250	2e-07	54.7
gi|114462376|gb|ABI75118.1|	comp116375_c0	22.86	280	155	12	158	414	733	8	2e-06	51.2
# BLAST processed 1 queries

## Sheet: Primers
Supplementary Table S3. Primers Used in This Study.
Primer Name	Sequences (5′–3′)	Application	Source
sxt001	TGCAGCGMTGCTACTCCTACTAC	sxtA1 amplification (forward)	[21]
sxt002	GGTCGTGGTCYAGGAAGGAG	sxtA1 amplification (reverse)	[21]
sxt007	ATGCTCAACATGGGAGTCATCC	sxtA4 amplification (forward)	[21]
sxt008	GGGTCCAGTAGATGTTGACGATG	sxtA4 amplification (reverse)	[21]
Regular oligo-dT	(T)16V (V = A,G,C)	cDNA library construction	[50]
LA4F	CAGGCAGGTATTGGGCTTCTACAC	sxtA4 qPCR (forward)	This study
LA4R	GCCTGTACTTGTCTGCCATCTCA	sxtA4 qPCR (reverse)	This study
GF	AGCAGCGGCATGTACCAGTCT	sxtG qPCR (forward)	This study
GR	GTTGAATGGGAGGCACTCGCTG	sxtG qPCR (reverse)	This study
41F	CAGAGCATCAGCAGCCTTCTTGTT	comp63141 qPCR (forward)	This study
41R	CCTTGGCAACCTGGTCTCTGATG	comp63141 qPCR (reverse)	This study
calmF	CGATGTGGACGGAGACGGACAA	A. catanella calmodulin qPCR (forward)	This study
calmR	TGAACAGGTCTCAGCAAGTCTTCTG	A. catanella calmodulin qPCR (reverse)	This study
